# Supplementary material for: Expression and subcellular localization of USH1C/harmonin in human retina provides insights into pathomechanisms and therapy
Source: PubMed Central journal article supplement — Hum Mol Genet. 2022 Aug 23;32(3):431–49. doi: 10.1093/hmg/ddac211 (PMC9851744; doi:10.1093/hmg/ddac211), 2022-08-23
Supplement: nagel-wolfrum_et_al_supplementary_material_10_05_2_ddac211.pdf [file nagel-wolfrum_et_al_supplementary_material_10_05_2_ddac211.pdf]

Supplemental Figures

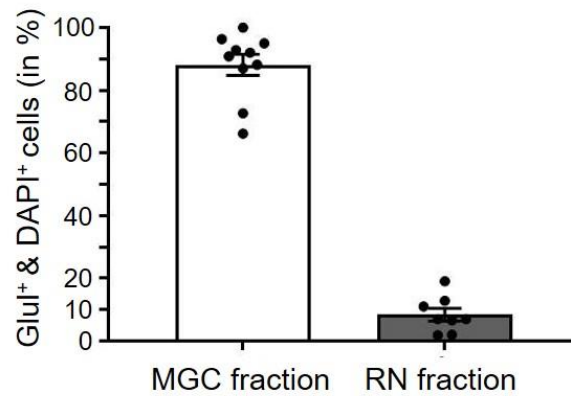

**Supplemental Figure S1: Quantification of Müller glial cell content following magnetic-activated cell sorting (MACS) sorting of human retinae.**

Drop samples from the Müller glial cell (MGC) fraction and retinal neuron (RN) fraction following magnetic-activated cell sorting (MACS) of human donor retinae were stained for the MGC marker glutamine synthetase (Glul) and DAPI as a nuclear marker. Percentage (%) of Glul<sup>+</sup> cells in each fraction was quantified revealing less than 10% contamination of the RN fraction with MGCs.

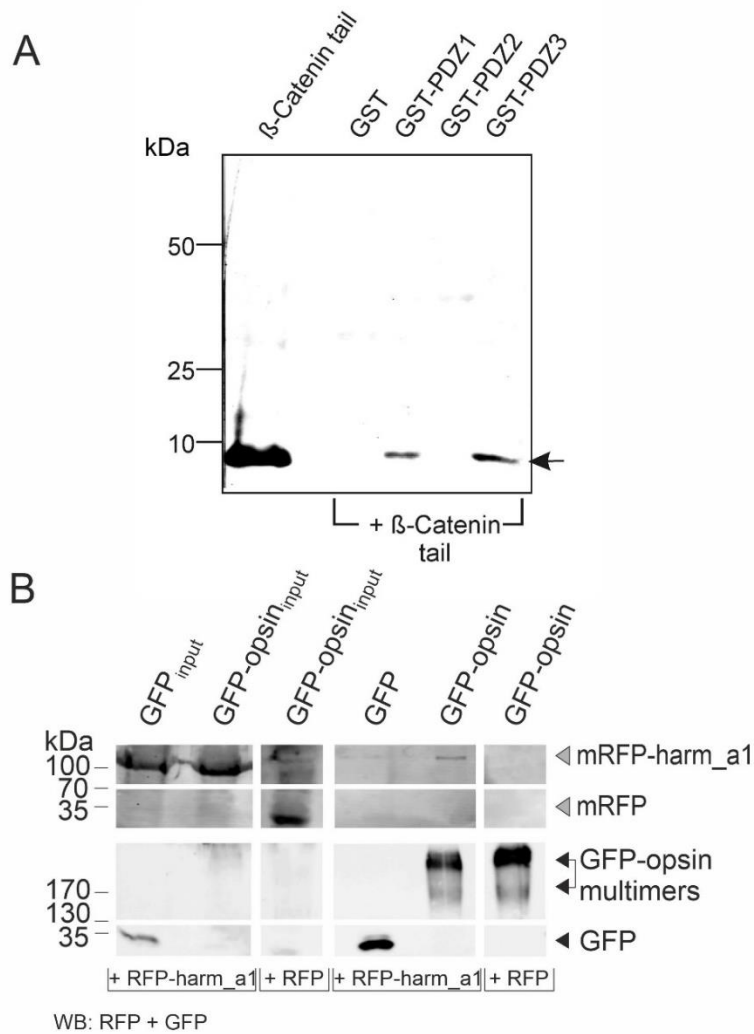

**Supplemental Figure S2. Analysis of novel interaction partners of harmonin.**

(A) GST-pull down of harmonin PDZ domains and  $\beta$ -catenin tail. PDZ1 and PDZ3 of harmonin are interacting with the tail of  $\beta$ -catenin ( $\beta$ -Catenin tail). GST only and harmonin PDZ2 are not interacting with  $\beta$ -catenin. (B) GFP-Trap® demonstrate harmonin-RFP interaction with GFP-opsin. RFP-harmonin a1 was precipitated by immobilized GFP-opsin via GFP-beads, but not by GFP alone. RFP only did not interact with GFP-opsin.

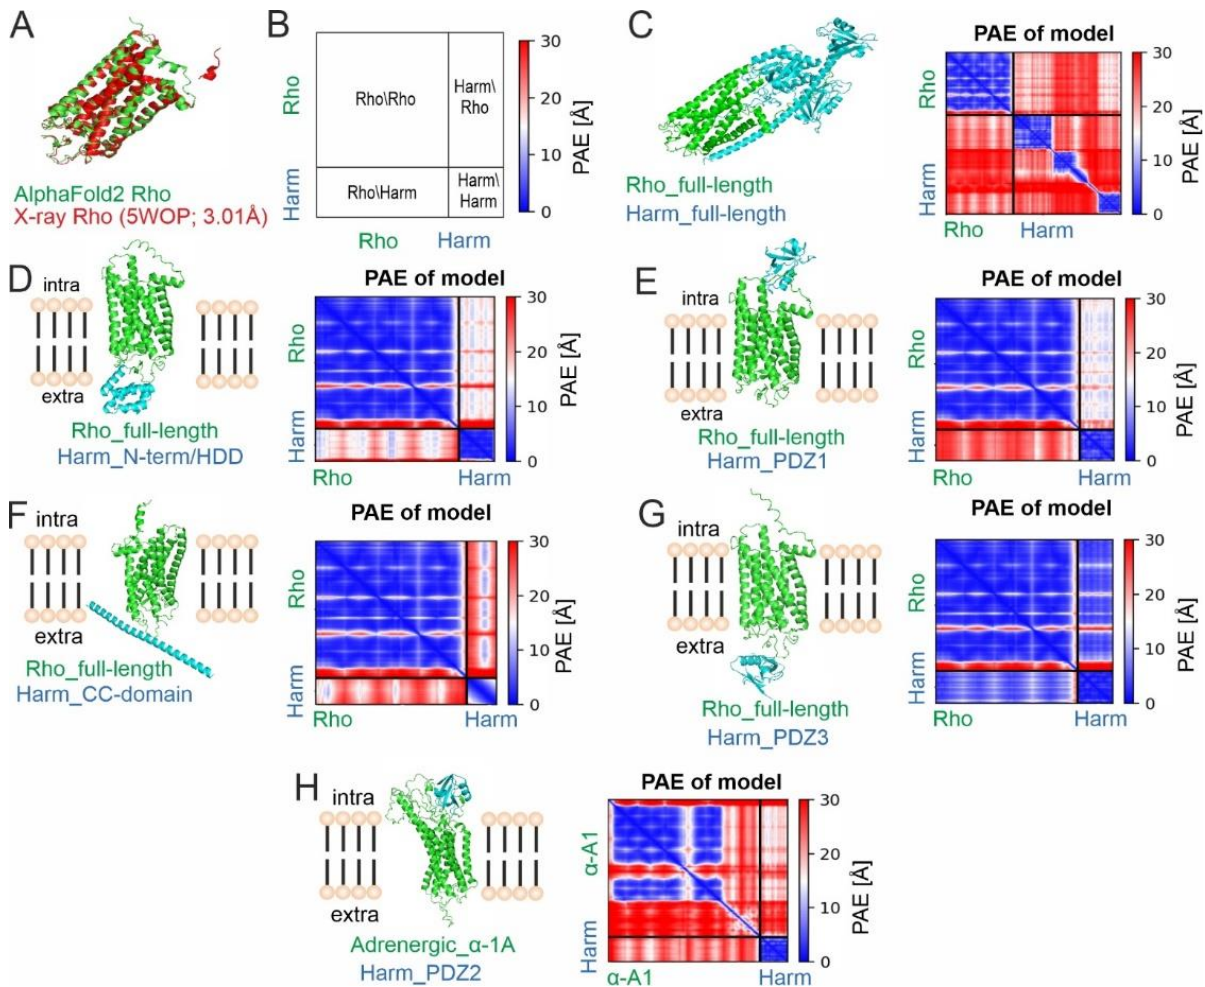

### Supplemental Figure S3. Structure predictions by AlphaFold2.

(A) The alignment of rhodopsin structures predicted by AlphaFold2 and determined by X-ray crystallography and NMR shows a high degree of concordance, indicating high accuracy of AlphaFold prediction for rhodopsin (Rho) structure based on amino acid sequences. (B) Schematic representation of the Predicted Alignment Error (PAE) of a model predicted by AlphaFold. As example: Rho-Harm protein complex. Rectangles lower left and upper right indicate Harm-Rod and Rho-Harm protein complexes, respectively. Heat map illustrates amino acid distances of the two analysed proteins in Å (red: large distance, blue: short distance, predicting protein-protein interaction). (C) Structure of the protein complex of full-length rhodopsin (Rho) and full-length harmonin\_a1 predicted by AlphaFold2. Predicted Alignment Error (PAE) of the model is high in almost all regions indicating no interaction (red color in heatmap of Ham:Rho and Rho:Harm rectangles). (D-H) Structures of the protein complexes of (D) rhodopsin-harmonin\_N-term/HHD, (E) rhodopsin-harmonin\_PDZ1, (F) rhodopsin-harmonin\_CC1, (G) rhodopsin-harmonin\_PDZ3, and (H) full-length adrenergic receptor  $\alpha$ -A1 and harmonin\_PDZ2 predicted by AlphaFold. AlphaFold predicted low confidence of protein complexes for rhodopsin-harmonin\_PDZ1 and adrenergic receptor  $\alpha$ -A1 and harmonin\_PDZ2. For rhodopsin-harmonin\_N-term/HHD, rhodopsin-harmonin\_CC1, and rhodopsin-harmonin\_PDZ3 complexes AlphaFold predicted binding of the intracellular protein harmonin to extracellular sites of rhodopsin.

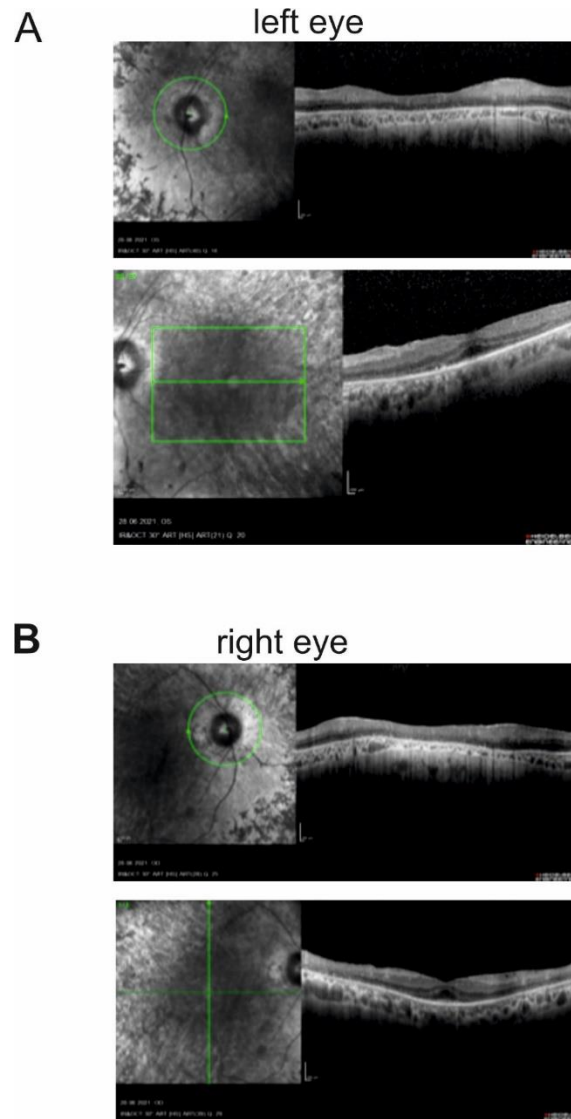

**Supplemental Figure S4. OCT of an USH1C patient.**

(A, B) Optical coherence tomography of the left (A) and right (B) eye of a 47-year old male USH1C patients with confirmed mutations in *USH1C* (c.91C>T;p.(R31\*); c.238dupC;p.(Arg80Profs\*69)) showing outer retinal atrophy with photoreceptor degeneration.

### Supplemental Tables:

**Supplemental Table S1. Human retina donors.** An internal donor number (#) was assigned to all donors. All donors had no documented history of retinal disease. Abbreviations: M, male, F, female, MGCs, Müller glia cells; RNs, retinal neurons; RT-PCR, reverse transcriptase polymerase chain reaction; qRT, quantitative PCR; WB, Western blot; IF, immunofluorescence microscopy; EM, electron microscopy; age in years.

| Donor #    | Age | Gender | hours post mortem | Application          |
|------------|-----|--------|-------------------|----------------------|
| 198-09     | 56  | M      | 30                | RT-PCR               |
| 199-09     | 66  | F      | 31                | RT-PCR, WB, IF, EM   |
| 205-09     | 57  | F      | 21                | RT-PCR, RNA-seq      |
| 220-09     | 44  | F      | 31                | RT-PCR, qRT          |
| 250-09     | 63  | M      | 9 ½               | RT-PCR, RNA-seq      |
| 252-09     | 68  | F      | 11 ½              | RT-PCR, qRT, IF      |
| 263-09     | 56  | M      | 27                | qRT, RNA-seq         |
| 269-09     | 73  | F      | 29                | RNA-seq              |
| 121-10     | 58  | F      | 21                | EM                   |
| 16-0928-OS | 76  | M      | 9                 | Bulk RNA-seq         |
| 16-0928-OD | 76  | M      | 9                 | Bulk RNA-seq         |
| 16-0932-OS | 70  | F      | 9                 | Bulk RNA-seq         |
| 16-0932-OD | 70  | F      | 9                 | Bulk RNA-seq         |
| 19-0013-OD | 89  | M      | 30                | WB – sorted MGCs/RNs |
| 19-0015-OS | 59  | F      | 26                | WB – sorted MGCs/RNs |

**Supplemental Table S2. RNA-seq analyses and bulk RNA-seq analyses of *USH1C*/harmonin transcripts in human retina.** RNA-seq analyses of human retinae and bulk RNA-seq analyses in enriched Müller glia cells and retinal neurons of *USH1C*/harmonin transcripts in human retina. (see Excel sheets)

### Supplemental Table S3. Primers for *USH1C*/harmonin class specific transcripts.

| Isoform/class | Forward Primer | Primer sequence 5'→3'            | Reverse Primer | Primer sequence 3'→5'         | Expected size (bp) |
|---------------|----------------|----------------------------------|----------------|-------------------------------|--------------------|
| a             | Exon 8         | TCA TCA GCC TGG TAG<br>GCT C     | Exon 15        | CAG GTT CCA CTC CCT<br>GAT C  | 554                |
| b             | Exon 14        | CAT CAC TGC TGA GGT<br>ACA CC    | Exon 18        | CAG CAG AGG AAA TCT<br>GCT C  | 349                |
| c             | Exon<br>14/22  | CTT CGC AAG CCA AAG<br>TGA TTT C | 3'UTR          | GGC TGA TCC GAG<br>GCT TTG TG | 458                |
